# Supplementary material for: High-risk group and functional subtypes of non-suicidal self-injury in young adults with mental disorders
Source: Front Psychiatry. 2023 Feb 23;14:1098178. doi: 10.3389/fpsyt.2023.1098178 (PMC9996010; doi:10.3389/fpsyt.2023.1098178)
Supplement: Supplementary file 1 [file Table_1.xlsx]

## Sheet: Table 1
Table 1 Areas for NSSI and Methods Used
Areas of body	Areas injured	Areas most often injured	Methods	Used	Method most often used
Hand/fingers	0.679	0.194	Cutting	0.612	0.302
Lower arm/wrist	0.664	0.388	Scratching	0.522	0.109
Upper arm/elbow	0.418	0.105	Hitting	0.515	0.14
Scalp	0.299	0.06	Headbanging	0.508	0.047
Thigh/knee	0.276	0.015	Piercing skin with sharp pointy objects	0.485	0.085
Face	0.269	0.037	Biting	0.373	0.031
Lower leg/ankle	0.194	0.008	Interfering with wound healing	0.336	0.008
Neck/throat	0.157	0.022	Hair pulling	0.313	0.023
Inside of mouth	0.097	0.008	Taking too much medication	0.246	0.023
Abdomen	0.06	0.008	Piercing of body parts	0.202	0.031
Back	0.052	0.015	Excessive use of alcohol	0.202	0.039
Other	0.03	0.067	Severe nail biting and/or nail injuries	0.157	0.039
Hips/buttock(s)	0.022	0.008	Other	0.03	0.085
Ear(s)	0.015	0.008
Genitals	0.015	0.008

## Sheet: Table 2
Table 2 The Characteristics of NSSI [N(%),Mean±SD]
	Total （N=190）	Repeated NSSI （N=112）	Occasionally/Without NSSI （N=78）	t/χ2	P-value
Diagnosis				-1.33	0.186
Major Depressive Disorder	102(53.7%)	63(61.8%)	39(38.2%)
Bipolar Disorder	50(26.3%)	29(58.0%)	21(42.0%)
Eating Disorder	38(20.0%)	20(52.6%)	18(47.4%)
Age		18.16±1.97	18.60±2.43
Gender				0.39	0.532
Male	42（22.1%）	23（54.8%）	19（45.2%）
Female	148（77.9%）	89（60.1%）	59（39.9%）
Frequency of NSSI last month				53.373	＜0.001***
Not at all	44（23.2%）	10（22.7%）	34（77.3%）
At least once	81（42.6%）	43（53.1%）	38（46.9%）
Weekly	43（22.6%）	37（86.0%）	6（14.0%）
Daily	22（11.6%）	22（100.0%）	0（0.0%）
Frequency of NSSI last 6month				78.394	＜0.001***
Not at all	10（4.4%）	1（14.3%）	9（85.7%）
1 to 5 times	111（60.8%）	42（36.5%）	69（63.5%）
Monthly	21（10.1%）	21（100.0%）	0（0.0%）
Weekly	35（18.4%）	35（100.0%）	0（0.0%）
Daily	13（6.3%）	13（100.0%）	0（0.0%）
Suicidal Ideation, SI				14.928	＜0.001***
No	34（17.9%）	10（29.4%）	24（70.6%）
Yes	156（82.1%）	102（65.4%）	54（34.6%）
Suicide Attempt, SA				12.452	＜0.001***
No	100（52.6%）	47（47.0%）	53（53.0%）
Yes	90（47.4%）	65（72.2%）	25（27.8%）
Have you ever been treated by a doctor after injuring yourself on purpose? (e.g., stitches, wound dressings, etc.)				3.969	0.046*
No	147（77.4%）	81（55.1%）	66（44.9%）
Yes	43（22.6%）	31（72.1%）	12（27.9%）
Have you been kept in hospital because of hurting yourself on purpose？				1.531	0.216
No	150（78.9%）	85（56.7%）	65（43.3%）
Yes	40（21.1%）	27（67.5%）	13（32.5%）
Age when NSSI first	14.92±3.18	14.40±4.02	15.57±2.90	-2.167	0.032*
Number of areas injured	3.68±2.33	4.38±2.60	2.60±1.81	5.828	＜0.001***
Number of methods used	4.87±3.08	5.88±3.13	3.53±2.44	5.827	＜0.001***
Addiction score	10.49±6.98	13.03±6.70	6.85±5.66	6.861	＜0.001***
*: P<0.05; ***: P<0.001

## Sheet: Table 3
Table 3 Comparison of influencing factors between different frequency groups [Mean±SD]
	Total	Repeated NSSI	Occasionally/	t/χ2	P-value	Cohen's d
	（N=258）	（N=112）	Without NSSI
			（N=146）
SAS	57.25±15.34	63.91±15.16	52.14±13.44	6.484	<0.001***	0.822
SDS	67.42±14.80	73.34±13.18	62.88±14.41	5.996	<0.001***	0.757
ASLEC	47.02±22.26	52.80±22.01	42.59±21.48	3.746	<0.001***	0.469
Punishment	9.44±6.43	10.32±6.57	8.77±6.26	1.935	0.054	0.242
Loss	3.14±3.54	3.66±3.81	2.73±3.28	2.057	0.041*	0.262
Interpersonal stress	11.49±5.80	13.16±5.98	10.21±5.33	4.122	<0.001***	0.521
Learning stress	9.91±5.65	11.09±5.86	9.00±5.34	2.987	0.003**	0.373
Health adjustment	6.50±3.93	7.20±4.18	5.97±3.65	2.52	0.012*	0.313
Others	6.55±4.00	7.38±3.97	5.91±3.93	2.955	0.003**	0.372
FAD	146.33±24.20	150.72±22.96	142.95±24.66	2.584	0.010*	0.326
Problem Solving	13.72±3.08	14.26±3.00	13.30±3.09	2.5	0.013*	0.315
Communication	23.12±4.83	24.07±4.75	22.40±4.77	2.797	0.006**	0.351
Roles	26.18±4.94	26.54±4.42	25.90±5.30	1.018	0.31	0.131
Affective Responsiveness	15.61±3.62	16.09±3.54	15.25±3.64	1.865	0.063	0.234
Affective Involvement	17.41±4.04	17.93±3.96	17.01±4.06	1.812	0.071	0.229
Behavior Control	21.83±3.13	21.97±3.05	21.71±3.19	0.663	0.508	0.083
General Functioning	28.46±7.03	29.87±6.93	27.38±6.93	2.859	0.005**	0.359
NEOFFI
Neuroticism	35.40±7.02	37.33±6.36	33.92±7.16	-3.974	<0.001***	0.504
Extraversion	22.74±7.23	21.82±6.77	23.45±7.51	1.797	0.074	-0.228
Openness to Experience	33.57±6.34	33.48±6.57	33.64±6.17	0.194	0.846	-0.025
Agreeableness	33.32±5.36	32.83±5.59	33.70±5.17	1.291	0.198	-0.162
Conscientiousness	30.00±7.11	28.42±6.54	31.22±7.30	3.192	0.002**	-0.404
CTQ	45.78±14.90	49.16±15.43	43.19±13.99	3.248	0.001**	0.405
Emotional mistreatment	10.40±4.77	11.73±4.75	9.37±4.54	4.061	<0.001***	0.508
Physical mistreatment	7.36±4.14	8.19±4.85	6.73±3.39	2.707	0.007**	0.349
Sexual abuse	6.01±2.67	6.12±3.04	5.93±2.36	0.549	0.583	0.07
Emotional negligence	13.69±5.29	14.31±5.01	13.22±5.47	1.651	0.1	0.208
Physical negligence	8.32±3.20	8.80±3.44	7.95±2.96	2.151	0.032*	0.265
SSRS	29.20±6.70	28.38±6.43	29.83±6.85	-1.725	0.086	-0.218
Objective support	7.55±2.44	7.37±2.22	7.70±2.60	-1.107	0.269	-0.136
Subjective support	15.42±3.98	15.19±3.84	15.60±4.09	-0.817	0.415	-0.103
Support utilization	6.23±1.92	5.84±1.73	6.53±2.01	-2.98	0.003**	-0.368
CIAS-R	41.62±11.20	41.61±12.23	41.63±10.37	-0.016	0.987	-0.001
Tolerance Symptoms	8.95±2.65	8.94±2.82	8.96±2.51	-0.064	0.949	-0.007
Compulsive Use	6.64±2.20	6.81±2.33	6.50±2.09	1.132	0.259	0.14
Withdrawal Symptoms	6.62±2.03	6.65±2.11	6.60±1.97	0.192	0.848	0.024
Time Management Problems	8.66±2.87	8.68±3.17	8.64±2.63	0.094	0.925	0.014
Interpersonal and Health-Related Problems	10.75±3.12	10.53±3.26	10.92±3.01	-1.015	0.311	-0.124
*: P<0.05; **: P<0.01; ***: P<0.001

## Sheet: Table 4
Table 4 Cluster centers and frequency of NSSI [Z-Score, N (%)]
	Cluster Ⅰ	Cluster Ⅱ	Cluster Ⅲ	Cluster Ⅳ	F/χ2	P-value
	(n=64)	(n=84)	(n=79)	(n=31)
Z-Score
SAS	0.819	0.381	-0.612	-1.164	82.325	＜0.001***
SDS	0.689	0.384	-0.345	-1.582	86.41	＜0.001***
Neuroticism	0.548	0.499	-0.458	-1.317	63.891	＜0.001***
CIAS-R	0.239	0.243	-0.303	-0.381	7.296	＜0.001***
ASLEC	0.948	0.035	-0.573	-0.594	49.228	＜0.001***
CTQ	0.91	-0.409	0.099	-1.022	54.191	＜0.001***
FAD	1.043	-0.594	0.14	-0.901	81.517	＜0.001***
SSRS-reverse	0.487	-0.465	0.414	-0.798	29.604	＜0.001***
Frequency of NSSI					39.47	＜0.001***
Without NSSI	9(14.1%)	17(20.2%)	24(30.4%)	18(58.1%)
Occasional NSSI	12(18.8%)	27(32.1%)	31(39.2%)	8(25.8%)
Repeated NSSI	43(67.1%)	40(47.7%)	24(30.4%)	5(16.1%)
***: P<0.001. Self-Rating Anxiety Scale, SAS; Self-Rating Depression Scale, SDS; Revised Chinese Internet Addiction Scale, CIAS-R; Adolescent Self-Rating Life Events Check List, ASLEC; Childhood Trauma Questionnaire, CTQ; Family Assessment Device, FAD; Reverse scoring Social Support Rate Scale, SSRS-reverse.

## Sheet: Table 5
Table 5 Logistic regression analysis of the association between clusters and repeated NSSI
	B	SE	Wald	P-value	Exp(B)	95% CI
Cluster Ⅳ-FIFE			27.465	＜0.001****
Cluster Ⅰ-UIUE	2.365	0.556	18.087	＜0.001***	10.648	3.580~31.672
Cluster Ⅱ-UIFE	1.553	0.535	8.431	0.004**	4.727	1.657~13.489
Cluster Ⅲ-FIUE	0.819	0.546	2.251	0.134	2.269	0.778~6.618
Constant	-1.649	0.488	11.398	0.001**	0.192
**: P<0.01; ***: P<0.001. Cluster Ⅰ-Unfavorable Internal personal characteristics and Unfavorable External environmental characteristics (UIUE); Cluster Ⅱ-Unfavorable Internal personal characteristics and Favorable External environmental characteristics (UIFE); Cluster Ⅲ-Favorable Internal personal characteristics and Unfavorable External environmental characteristics (FIUE); Cluster Ⅳ- Favorable…

## Sheet: Table 6 
Table 6 Factor Loadings, Eigenvalues for the Function Factors of the OSI-F- revised by Zhang et al.
Items	Factor1	Factor 2	Factor 3	Factor 4	Factor 5	Factor 6	Communalities
	Emotion regulation	Social influence	Sensation seeking	Social influence	Anti-suicide	Social influence
21 To relieve feelings of sadness or feeling "down"	0.764						0.646
17 To help me escape from uncomfortable feelings or moods	0.75						0.613
1 To release unbearable tension	0.735						0.544
8 To relieve nervousness/fearfulness	0.643						0.603
10 To distract me from unpleasant memories	0.641						0.501
19 To experience physical pain in one area, when the other pain I feel is unbearable	0.536						0.421
13 To release anger	0.53						0.432
26 To release frustration	0.507						0.61
27 To get out of doing something that I don't want to do		0.791					0.73
20 To stop people from expecting so much from me		0.696					0.596
9 To avoid getting in trouble for something I did		0.672					0.602
22 To have control in a situation where no one can influence me		0.466					0.493
2 To experience a "high"			0.833				0.733
7 To provide a sense of excitement that feels exhilarating			0.824				0.774
28 For no reason that I know about, it just happens sometimes			0.557				0.387
25 To produce a sense of being real when I feel numb and "unreal"			0.514				0.604
4 To stop feeling alone and empty			0.498				0.558
5 To get care and attention from other people				0.791			0.711
15 To show others how hurt or damaged I am				0.753			0.637
14 To stop my friends/boyfriend/girlfriend from being angry with me				0.615			0.537
12 To belong to a group				0.532			0.529
3 To stop my parents from being angry at me				0.465			0.531
23 To stop me from thinking about ideas of killing myself					0.913		0.879
24 To stop me from acting out ideas of killing myself					0.911		0.882
11 To change my body image and/or appearance						0.716	0.623
29 To prove to myself how much I can take						0.713	0.618
16 To show others how strong or tough I am						0.58	0.459
Eigenvalues	7.33	2.916	1.967	1.769	1.208	1.063
Variance%	14.523	11.005	9.852	8.863	8.126	7.827

## Sheet: Table 7 
Table 7 Factor Loadings, Eigenvalues for the Function Factors of the OSI-F (revised English edition)
Items	Factor1	Factor 2	Factor 3	Factor 4
	Emotion regulation	Social influence	Sensation seeking	Social influence
19 To experience physical pain in one area, when the other pain I feel is unbearable	0.697
21 To relieve feelings of sadness or feeling "down"	0.676
25 To produce a sense of being real when I feel numb and "unreal"	0.642
10 To distract me from unpleasant memories	0.623
1 To release unbearable tension	0.602
13 To release anger	0.597
26 To release frustration	0.582
23 To stop me from thinking about ideas of killing myself	0.543
6 To punish myself	0.499
27 To get out of doing something that I don't want to do		0.774
9 To avoid getting in trouble for something I did		0.65
3 To stop my parents from being angry at me		0.649
20 To stop people from expecting so much from me		0.627
15 To show others how hurt or damaged I am		0.471
2 To experience a "high"			0.867
7 To provide a sense of excitement that feels exhilarating			0.846
4 To stop feeling alone and empty			0.492
29 To prove to myself how much I can take			0.465
12 To belong to a group				0.749
11 To change my body image and/or appearance				0.693
Eigenvalues	5.92	2.18	1.543	1.377
Variance%	18.93	14.584	12.126	9.456
